# Supplementary material for: Transforming the molecular orientation of crystalline lamellae by the degree of multi-fluorination within D–A copolymers and its effect on photovoltaic performance
Source: Royal Society of Chemistry journal article supplement (doi:10.1039/c8tc03872d), 2018-01-01
Supplement: c8tc03872d1.pdf [file c8tc03872d1.pdf]

## Electronic Supplementary Information (ESI)

### **Transforming Molecular Orientation of Crystalline Lamellae by the Degree of Multi-Fluorination within D-A Copolymers and its Effect on Photovoltaic Performance**

*Jianhong Gao<sup>a</sup>, Wei Wang<sup>a</sup>, Yanqi Hu<sup>a</sup>, Chun Zhan<sup>a</sup>, Shengqiang Xiao<sup>\*a</sup>, Xinhui Lu<sup>\*b</sup>, and Wei You<sup>\*ac</sup>*

<sup>a</sup> State Key Laboratory of Advanced Technology for Materials Synthesis and Processing Wuhan

University of Technology, Wuhan, 430070, P. R. China. E-mail: \*E-mail:shengqiang@whut.edu.cn

<sup>b</sup> Department of Physics, Chinese University of Hong Kong, Hong Kong, P. R. China. \*E-mail:

xhlu@phy.cuhk.edu.hk

<sup>c</sup> Department of Chemistry, University of North Carolina at Chapel Hill, Chapel Hill, North

Carolina 27599-3290, United States. \*E-mail: wyou@unc.edu

## The list of the content:

1. Materials
2. Measurements and instruments.
3. Fabrication and characterization of polymer solar cells.
4.  $^1\text{H}$ ,  $^{13}\text{C}$ -NMR and high resolution MALDI-TOF mass spectrometry of the compounds in this work (**Fig. S1- Fig. S17**)
5. Supplementary figures and tables:
  - a) TGA curves of the two copolymers at a heating rate of  $10\text{ }^\circ\text{C min}^{-1}$  under nitrogen (**Fig. S18**).
  - b) Cyclic voltammogram curves of the two copolymers in thin film (**Fig. S19**).
  - c)  $J$ - $V$  characteristics of polymers:PC<sub>71</sub>BM PSCs in conventional architecture at different D:A weight ratio (**Fig. S20**).
  - d) Photovoltaic properties of Polymers:PC<sub>71</sub>BM PSCs in conventional architecture at different D/A weight ratios (**Table S1**).
  - e) The optimized photovoltaic properties of PDTBBT-3F:PC<sub>71</sub>BM = 1:2.5 and PDTBBT-4F:PC<sub>71</sub>BM = 1:2 PSCs in conventional architecture with processing additives of DIO and DPE (**Table S2**).
  - f) Extinction coefficient spectra of BHJ blend films for optimum device based on the Polymers: PC<sub>71</sub>BM prepared from *o*-DCB (**Fig. S21**).
  - g)  $J^{0.5}$  vs  $V_{\text{appl}} - V_{\text{bi}} - V_{\text{rs}}$  plots for hole-only and electron-only devices of PDTBBT-3F and PDTBBT-4F blend films (**Fig. S22**)
  - h) Tapping-mode AFM height and phase images of the optimized BHJ blends (**Fig. S23**).
  - i) Physical parameters of PDTBBT-3F:PC<sub>71</sub>BM and PDTBBT-4F:PC<sub>71</sub>BM devices (**Table S3**).
  - j) The coherence length ( $L_c$ ) and full width at half-maximum (FWHM) along both OOP and IP direction of the neat PDTBBT-3F and PDTBBT-4F, and the corresponding polymer:PC<sub>71</sub>BM blend films (**Table S4**).

## 1. Materials

4,7-dibromo-5,6-difluorobenzo[c][1,2,5]thiadiazole and 4,7-dibromo-5-fluorobenzo[c][1,2,5]-thiadiazole were purchased from Derthon. [6,6]-Phenyl C<sub>71</sub>-butyric acid methyl ester (PC<sub>71</sub>BM) was purchased from Solenne. Other reagents were used as purchased from JK Chemical and Energy Chemical. Anhydrous THF was obtained by distillation over sodium/benzophenone under nitrogen atmosphere.

## 2. Measurements and Instruments

<sup>1</sup>H and <sup>13</sup>C NMR spectrum were recorded on a Bruker AV500 at 500 MHz using deuterated chloroform (CDCl<sub>3</sub>) as the solvent. The molecular weights of two polymers were determined by high temperature gel-permeation chromatography (GPC) with trichlorobenzene as the eluent at 150 °C relative to a polystyrene standard on an Agilent PL-GPC 220 system. Thermogravimetric analysis measurements were carried out on NETZSCH (STA449F3) at a heating rate of 10 °C min<sup>-1</sup> under nitrogen. Room temperature UV-vis spectra of polymer solutions and films were recorded on a SHIMADZU UV-1750 spectrophotometer. The dilute solutions were prepared as followings: we first prepared the polymer solutions with a concentration of 10 mg mL<sup>-1</sup> in dichlorobenzene, and then took 40 µL of them with a micro syringe and injected into appropriate amount of dichlorobenzene (volume with dichlorobenzene to 4 mL) to attain a concentration of 1 × 10<sup>-5</sup> mg mL<sup>-1</sup>. Solution UV-Vis absorption spectra at elevated temperatures were collected on Perkin Elmer Lambda 750 UV/VIS/NIR Spectrometer. The temperature-dependent experiments were measured through stepwise increasing temperature from room temperature to fully disaggregate temperature (such as 100 °C). Cyclicvoltammetry (CV) experiments were performed with CHI 660D analyzer. All CV measurements were carried out in 0.1 M tetrabutylammonium hexafluorophosphate (Bu<sub>4</sub>NPF<sub>6</sub>) in anhydrous acetonitrile with a conventional three-electrode configuration employing a platinum wire as a counter electrode, platinum electrode coated with a thin polymer film as a working electrode, and Ag/Ag<sup>+</sup> electrode as a reference electrode at a scan rate of 80 mV s<sup>-1</sup>. The atomic force microscopy (AFM) images (5.0 µm × 5.0 µm) were obtained through tapping mode on Multimode 8 SPM at ambient condition. RTESPA (0.01 - 0.025 ohm-cm Antimony (n) doped silicon) tips with a spring constant of 20 - 80 N m<sup>-1</sup> and a frequency of 305 - 356 kHz were used in

imaging. The GIWAXS measurements of the pristine polymers and polymer:fullerene blend films were conducted at 23 A SWAXS beamline of a superconductor wiggler at the National Synchrotron Radiation Research Center, Hsinchu, Taiwan, using 10 keV beam incident at 0.15° and a C9728DK area detector.

### 3. Fabrication and Characterization of Polymer Solar Cells

The PSC devices were fabricated with the conventional configuration of ITO/PEDOT:PSS/donor (PDTBBT-3F or PDTBBT-4F):PC<sub>71</sub>BM /Ca (~ 20 nm)/Al (80 nm). Prior to be used, indium tin oxide glass substrates were sequentially cleaned with distilled water, acetone, iso-propanol and were treated by UV-Ozone. For BHJ devices, poly(3,4-thylenedioxythiophene):polystyrenesulfonic acid (PEDOT:PSS) was spin-coated onto the ITO substrate and annealed at 150 °C for 20 min. To prepare the BHJ films, the polymers of PDTBBT-3F or PDTBBT-4F (10 mg mL<sup>-1</sup>) were blended with PC<sub>71</sub>BM in *o*-dichlorobenzene (*o*-DCB), respectively. BHJ films were spin-cast on the top of the PEDOT:PSS layers in a N<sub>2</sub> filled glove box. Subsequently, Ca (20 nm) and Al (80 nm) were sequentially deposited on the top of the active layers as the cathode at a pressure of 2 × 10<sup>-6</sup> mbar through a shadow mask that defines 8 devices with each active area of 0.09 cm<sup>2</sup>.

Current-voltage measurements were carried out in a glovebox under AM 1.5 G irradiation (100 mW cm<sup>-2</sup>) from a 450 W solar simulator (Newport 94023A-U) calibrated by a NREL certified standard silicon cell. Current versus potential (*J-V*) curves were recorded with a Keithley 2420 digital source meter. For external quantum efficiency (EQE) tests, the devices were transferred by a self-made testing box from the glovebox into the chamber of a 7-SCSpec spectral performance of solar cell test system consisting of a 500 watt SCS028-7ILX500 xenon light source, a 7ISW301 vertical grating spectrometer, a 71FW6 filter wheel, a SR810 lock-in amplifier. The calibration of the incident monochromatic light was carried out with a Hamamatsu S1337-1010 BQ Silicon photodetector.

The SCLC *J-V* curves were obtained in the dark from the electron-only and hole-only devices of ITO/ZnO/active-layer/Ca/Al and ITO/PEDOT:PSS/active-layer/MoO<sub>3</sub>/Ag, respectively. The electron and hole mobility were calculated using the Mott-Gurney square law,  $J = (9/8)\epsilon_0\epsilon_r\mu(V^2/L^3)$ , where  $\epsilon_0$  is vacuum permittivity,  $\epsilon_r$  is the dielectric constant of the polymer used,  $\mu$  is the charge

carrier mobility,  $V$  is the effective applied voltage, and  $L$  is the thickness of the active film in the device.

#### 4. $^1\text{H}$ , $^{13}\text{C}$ -NMR and high resolution MALDI-TOF mass spectrometry of new compounds in this work

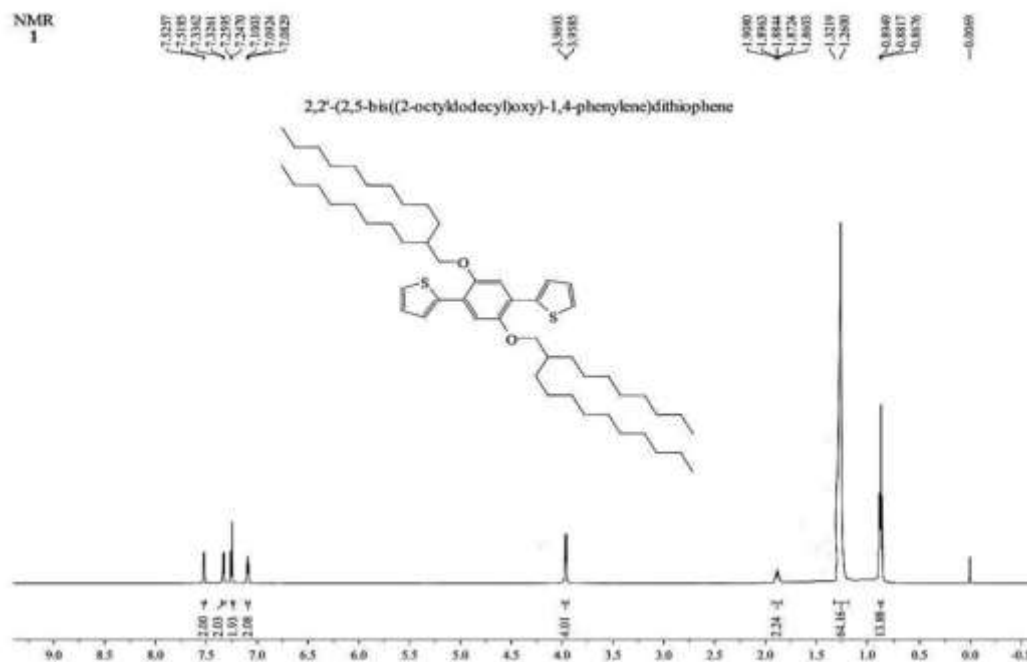

**Fig. S1**  $^1\text{H}$  NMR of 2,2'-(2,5-bis((2-octyldodecyl)oxy)-1,4-phenylene)dithiophene (1).

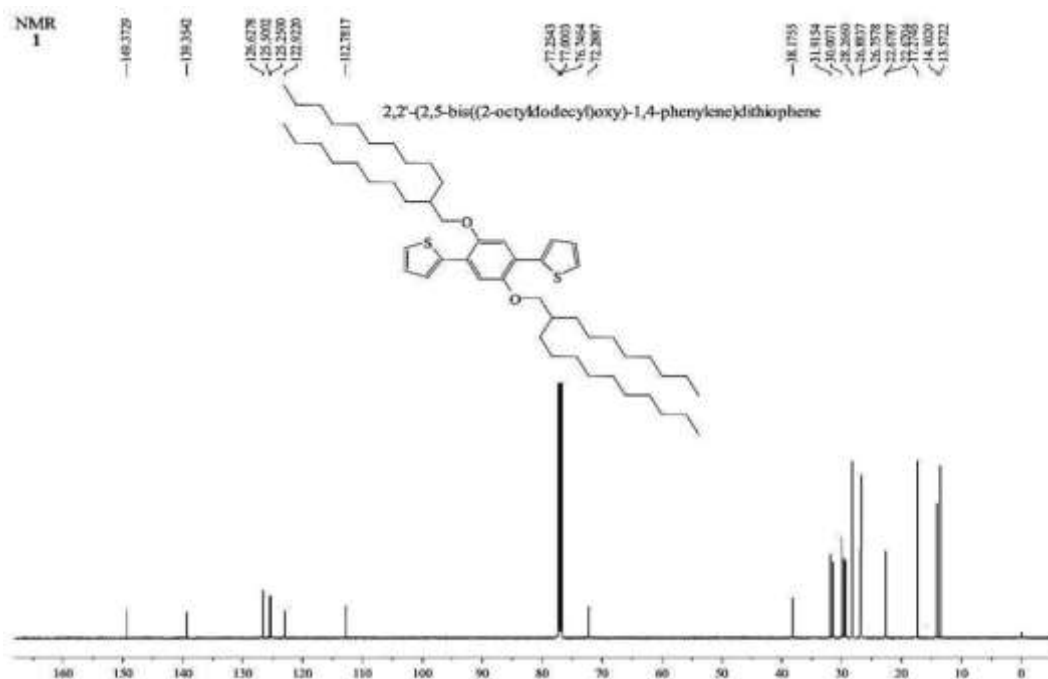

**Fig. S2**  $^{13}\text{C}$  NMR of 2,2'-(2,5-bis((2-octyldodecyl)oxy)-1,4-phenylene)dithiophene (1).

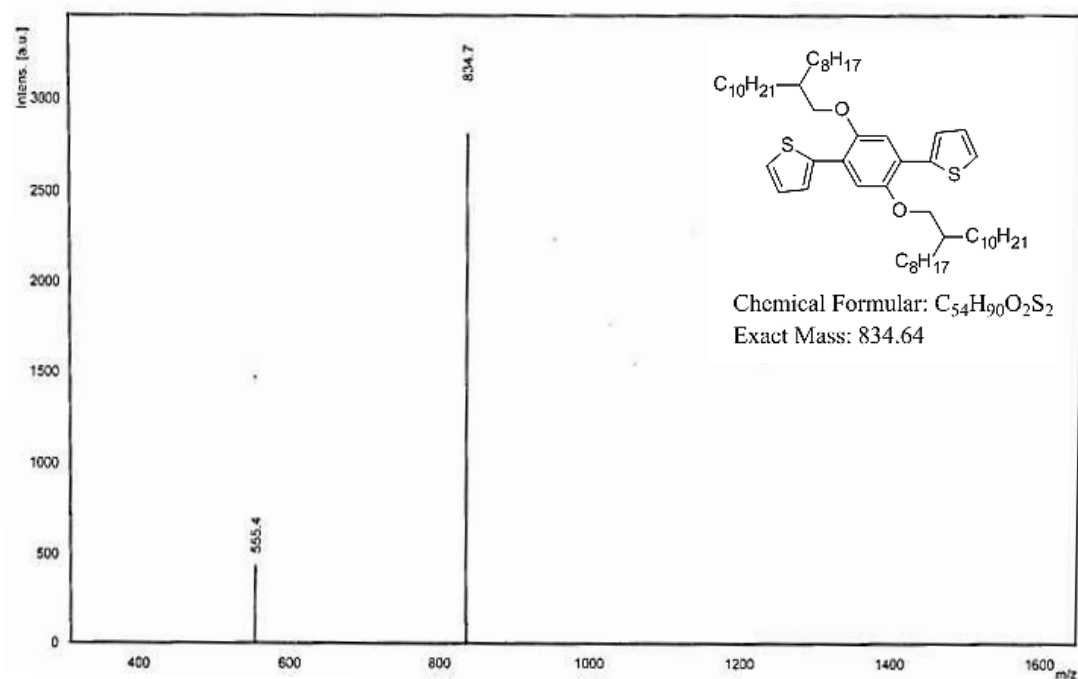

**Fig. S3** MALDI-TOF mass spectrometry of 2,2'-(2,5-bis((2-octyldodecyl)oxy)-1,4-phenylene)dithiophene (1).

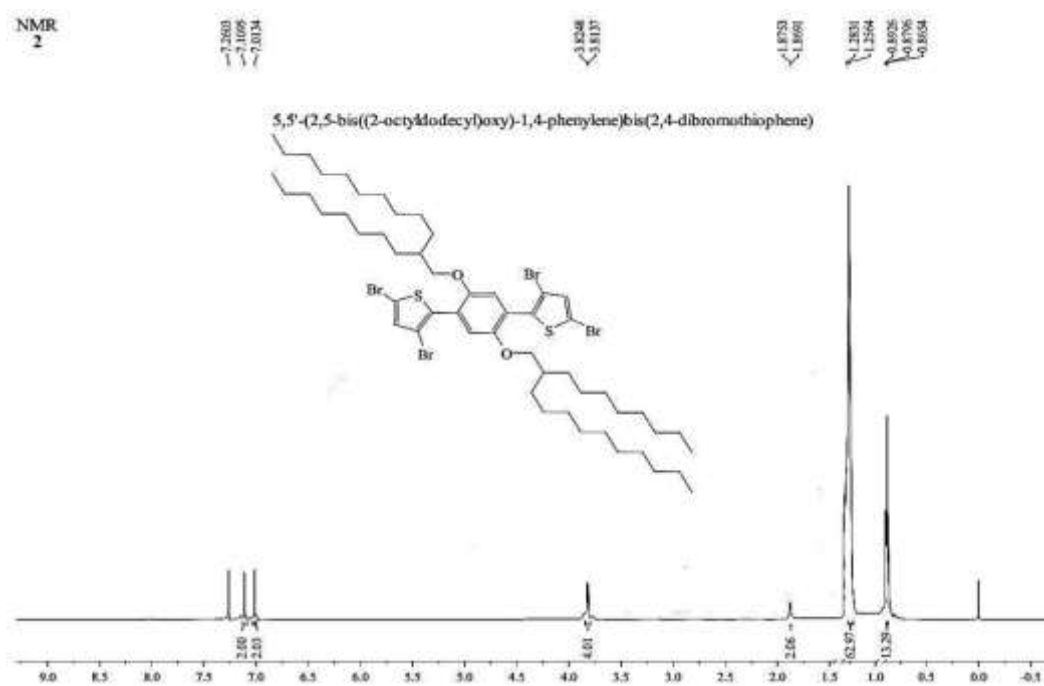

**Fig. S4**  $^1H$  NMR of 5,5'-(2,5-bis((2-octyldodecyl)oxy)-1,4-phenylene) bis(2,4-dibromothiophene) (2).

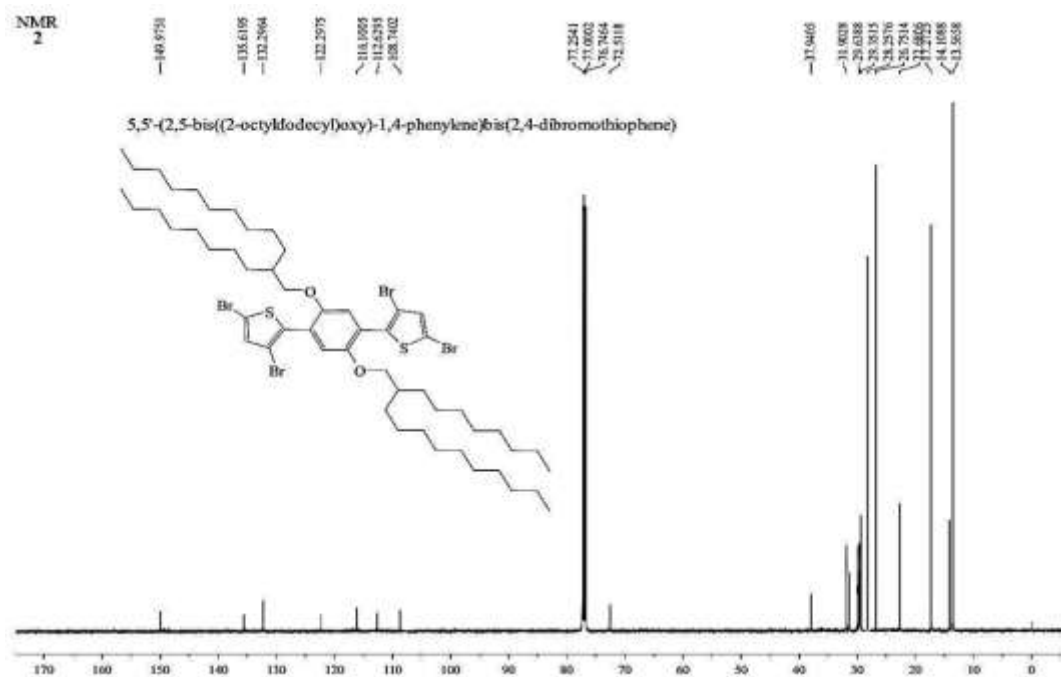

**Fig. S5**  $^{13}\text{C}$  NMR of 5,5'-(2,5-bis((2-octyldodecyl)oxy)-1,4-phenylene) bis(2,4-dibromothiophene) (2).

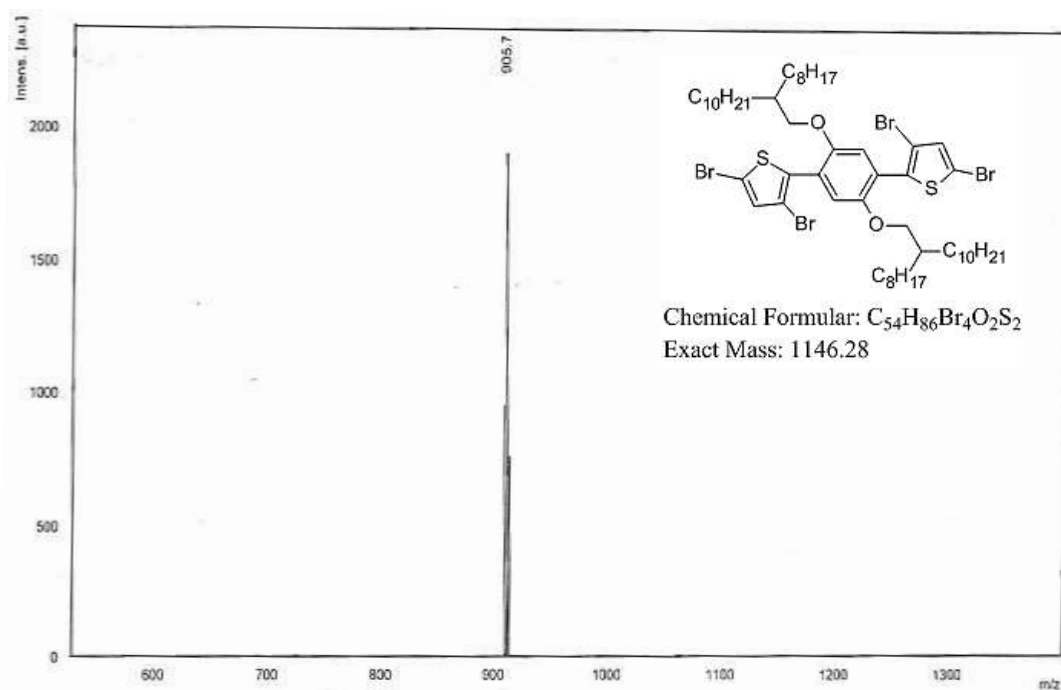

**Fig. S6** MALDI-TOF mass spectrometry of 5,5'-(2,5-bis((2-octyldodecyl)oxy)-1,4-phenylene) bis(2,4-dibromothiophene) (2).

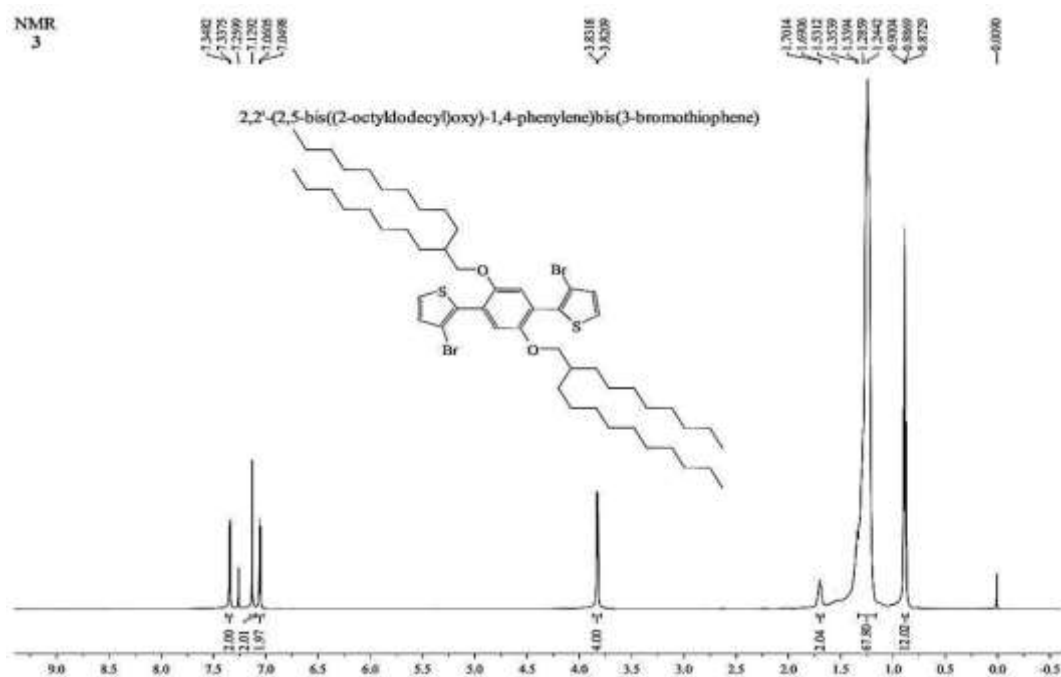

**Fig. S7**  $^1\text{H}$  NMR of 2,2'-(2,5-bis((2-octyldodecyl)oxy)-1,4-phenylene)bis(3-bromothiophene) (3).

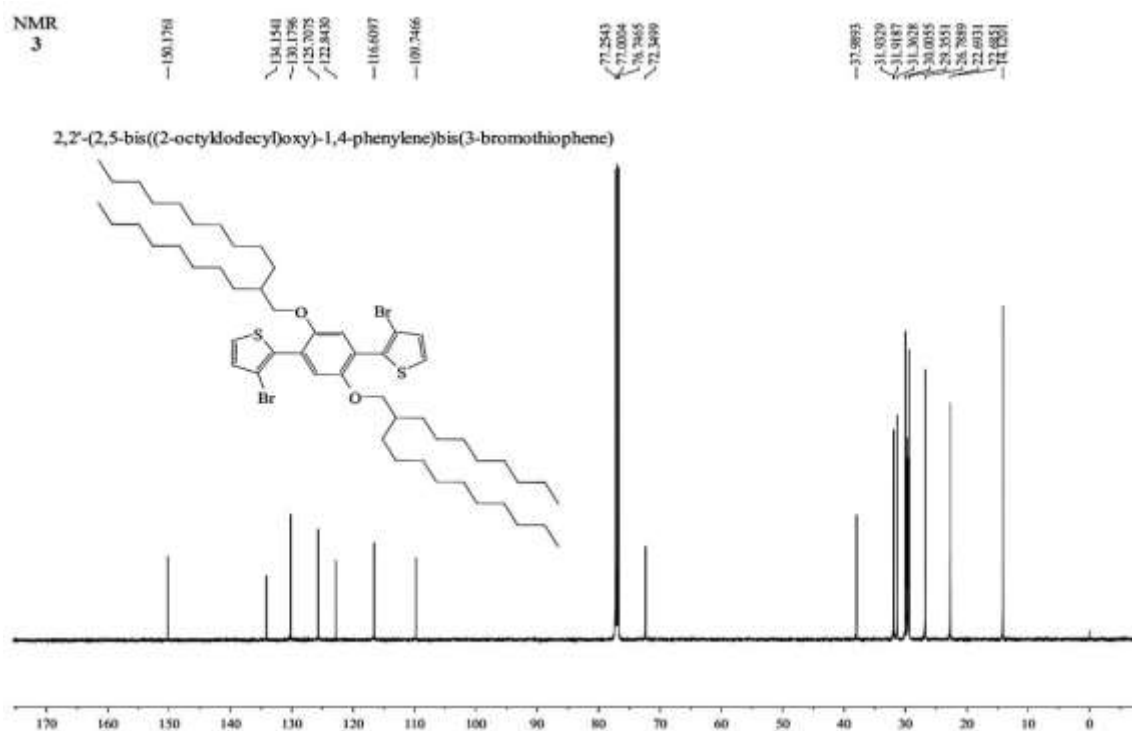

**Fig. S8**  $^{13}\text{C}$  NMR of 2,2'-(2,5-bis((2-octyldodecyl)oxy)-1,4-phenylene) bis(3-bromothiophene) (3).

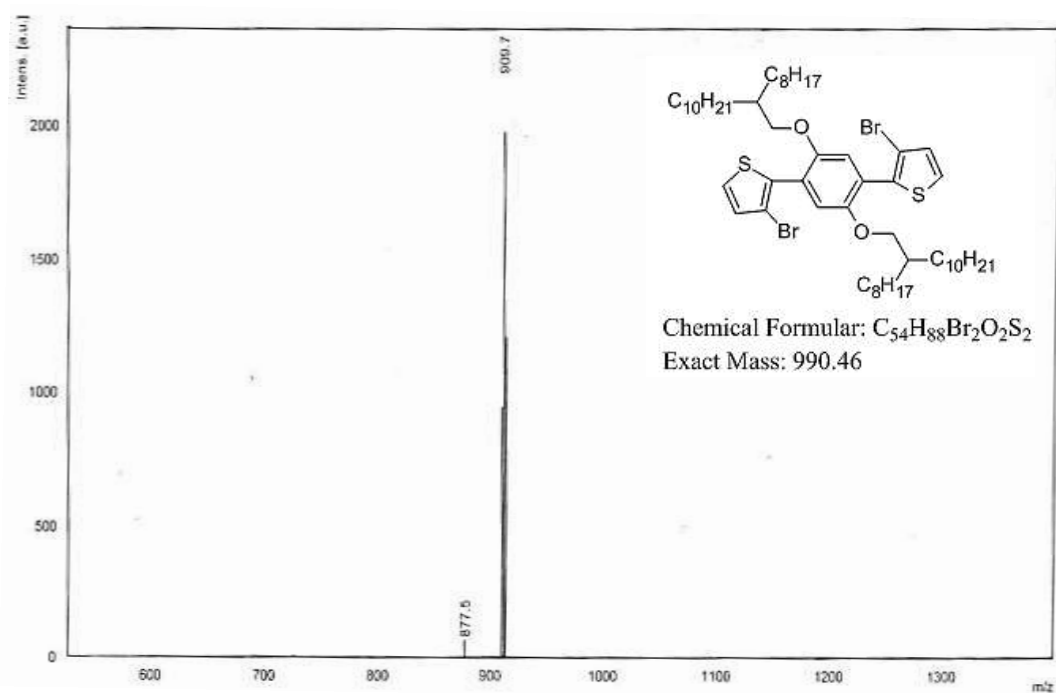

**Fig. S9** MALDI-TOF mass spectrometry of 2,2'-(2,5-bis((2-octyldodecyl)oxy)-1,4-phenylene)bis(3-bromothiophene) (3).

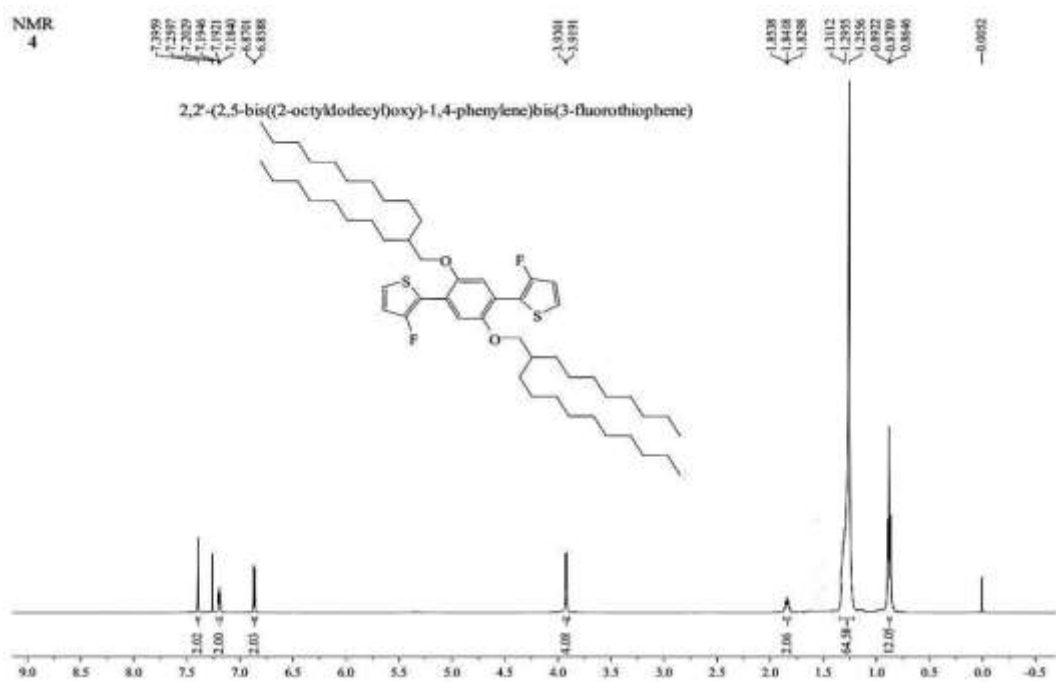

**Fig. S10**  $^1H$  NMR of 2,2'-(2,5-bis((2-octyldodecyl)oxy)-1,4-phenylene)bis(3-fluorothiophene) (4).

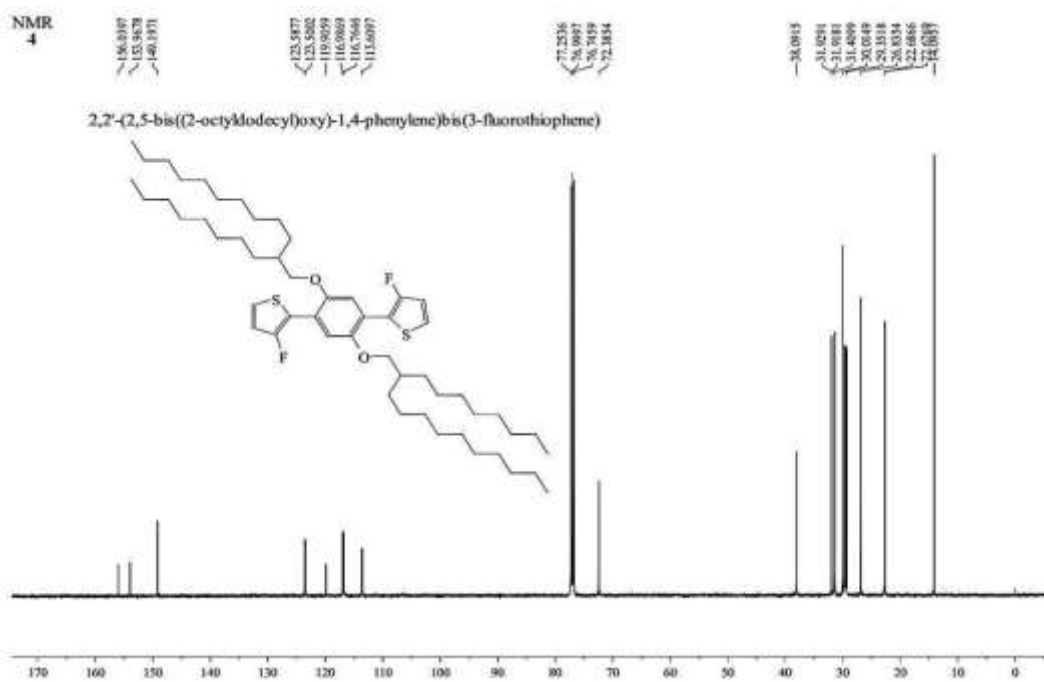

**Fig. S11**  $^{13}\text{C}$  NMR of 2,2'-(2,5-bis((2-octyldodecyl)oxy)-1,4-phenylene)bis(3-fluorothiophene) (4).

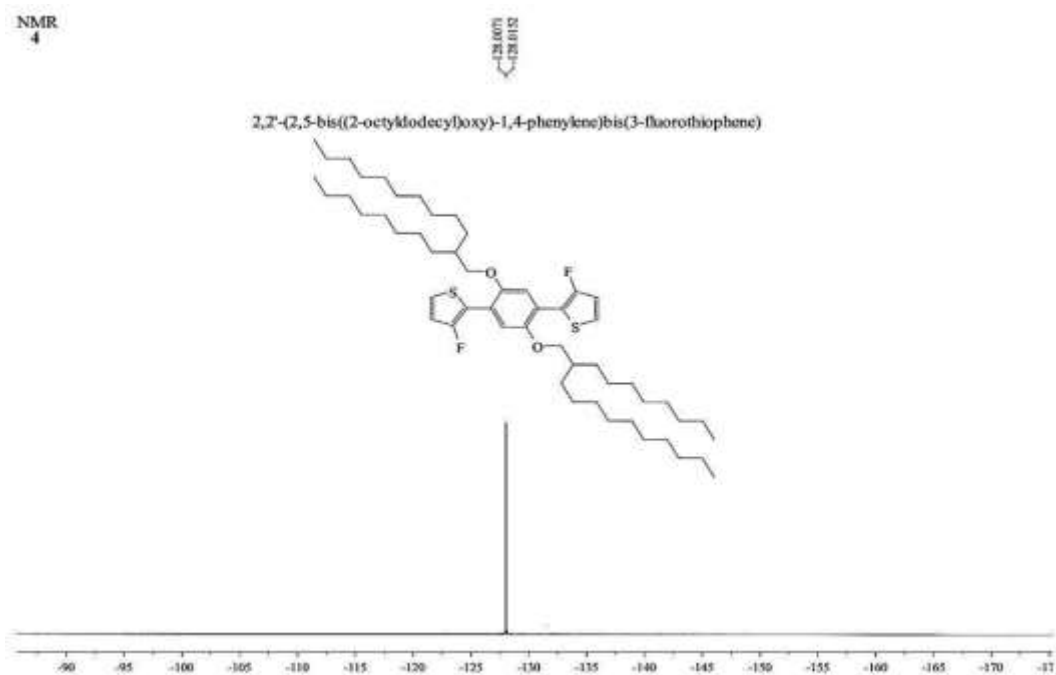

**Fig. S12**  $^{19}\text{F}$  NMR of 2,2'-(2,5-bis((2-octyldodecyl)oxy)-1,4-phenylene)bis(3-fluorothiophene) (4).

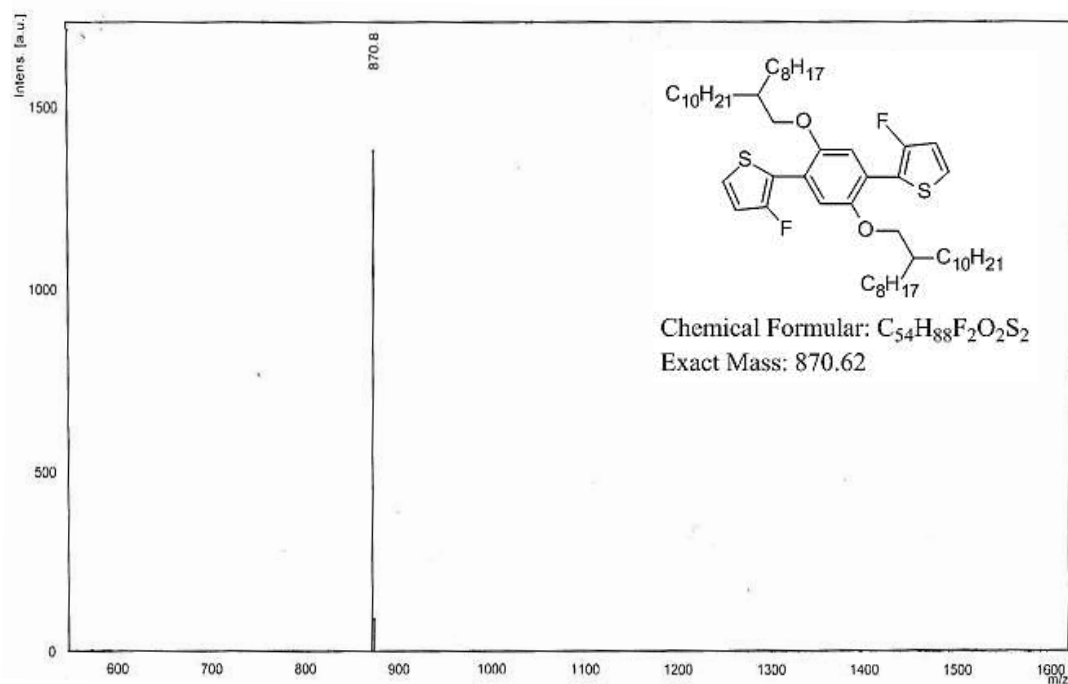

**Fig. S13** MALDI-TOF mass spectrometry of 2,2'-(2,5-bis((2-octyldodecyl)oxy)-1,4-phenylene)bis-(3-fluorothiophene) (4).

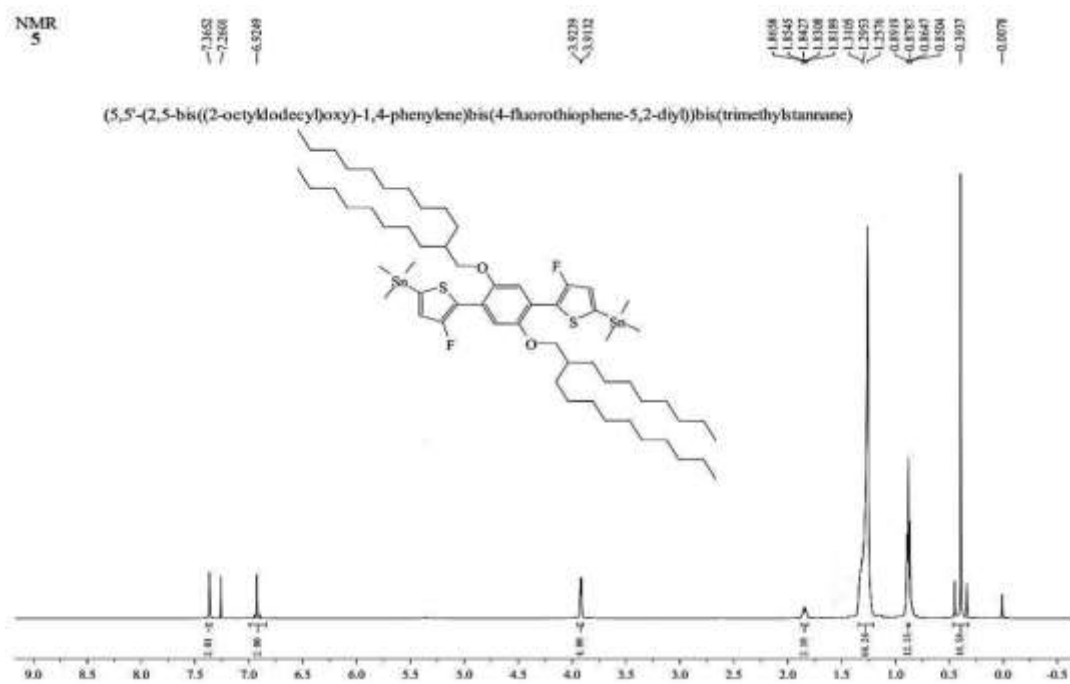

**Fig. S14**  $^1H$  NMR of (5,5'-(2,5-bis((2-octyldodecyl)oxy)-1,4-phenylene)bis-(4-fluorothiophene-5,2-diyl))bis(trimethylstannane) (5).

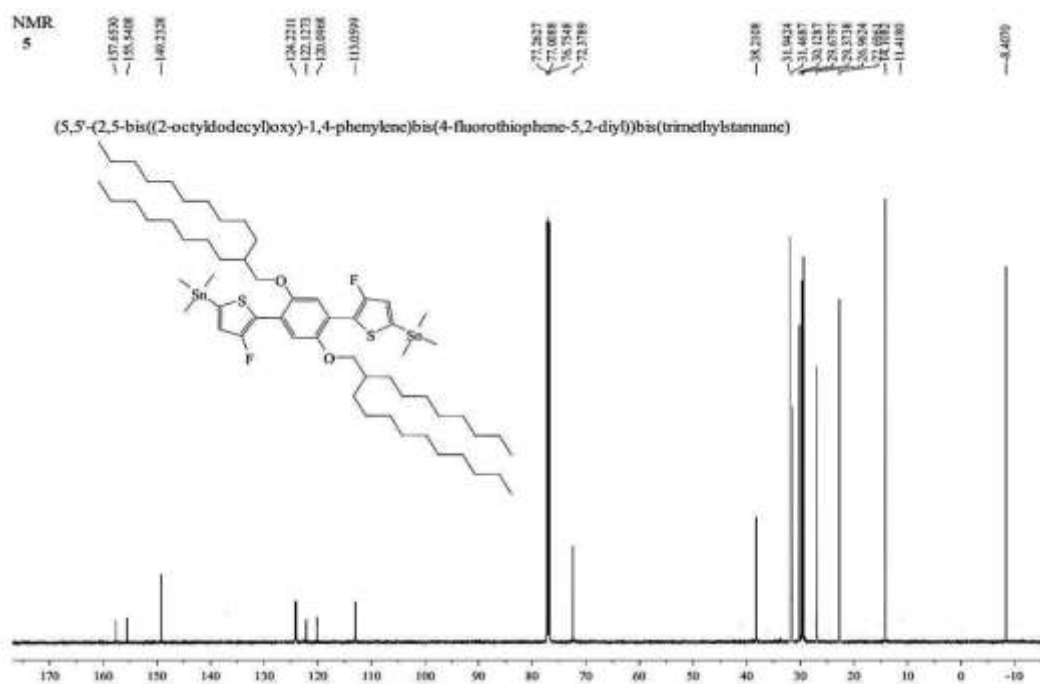

**Fig. S15**  $^{13}\text{C}$  NMR of (5,5'-(2,5-bis((2-octyldodecyl)oxy)-1,4-phenylene)bis(4-fluorothiophene-5,2-diyl))bis(trimethylstannane) (5).

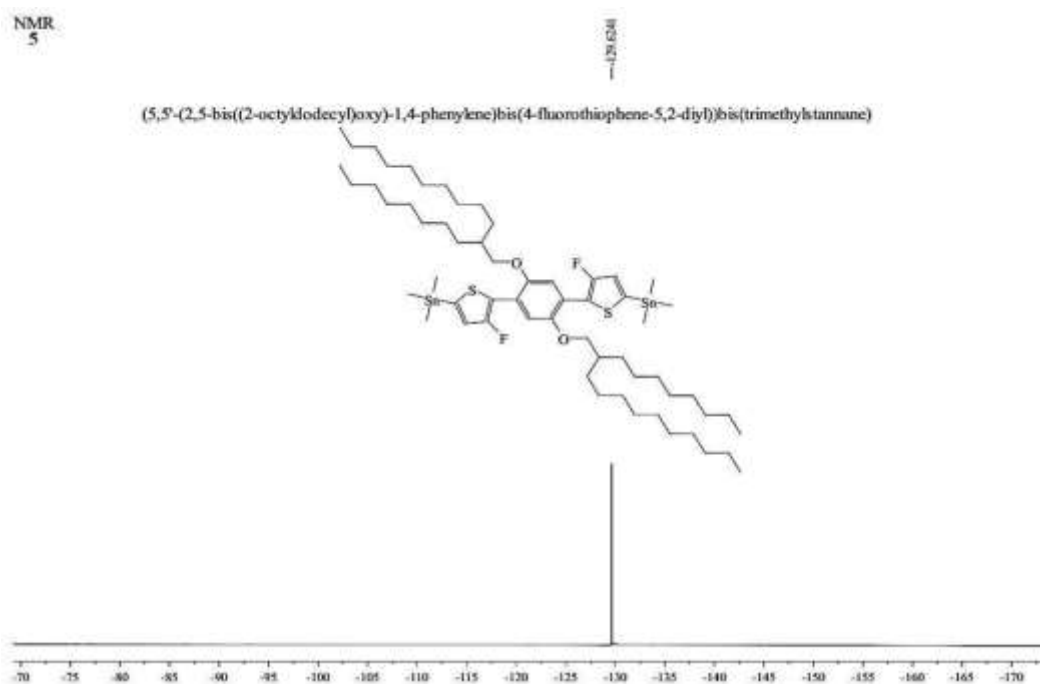

**Fig. S16**  $^{19}\text{F}$  NMR of (5,5'-(2,5-bis((2-octyldodecyl)oxy)-1,4-phenylene)bis(4-fluorothiophene-5,2-diyl))bis(trimethylstannane) (5).

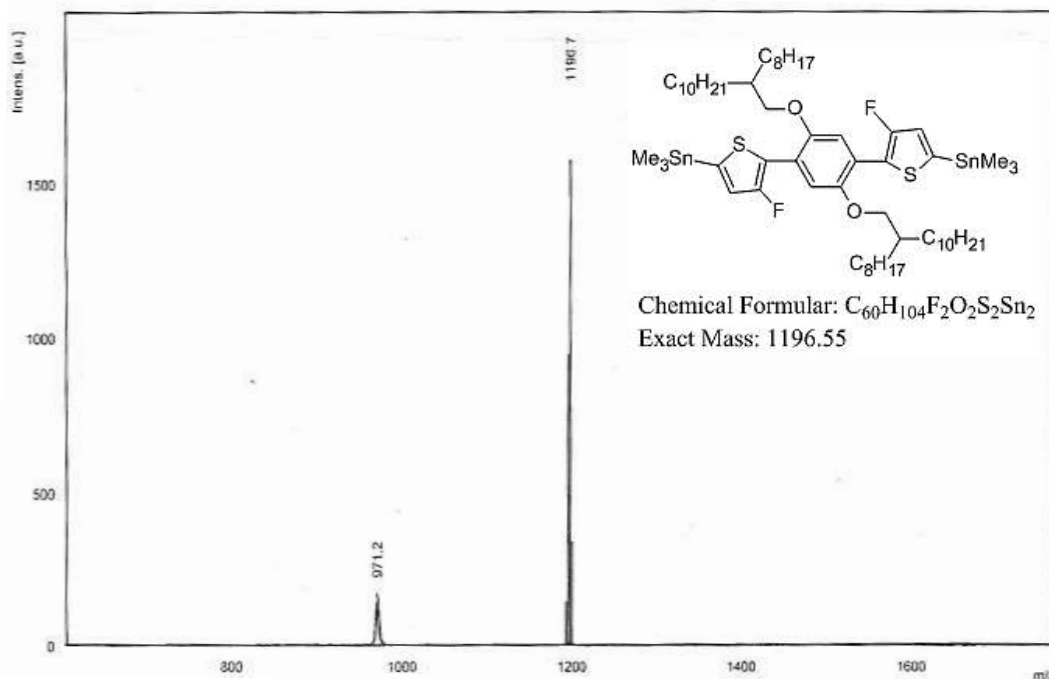

**Fig. S17** MALDI-TOF mass spectrometry of (5,5'-(2,5-bis((2-octyldodecyl)oxy)-1,4-phenylene)bis-(4-fluorothiophene-5,2-diyl))bis(trimethylstannane) (5).

## 5. Supplementary Figures and Tables

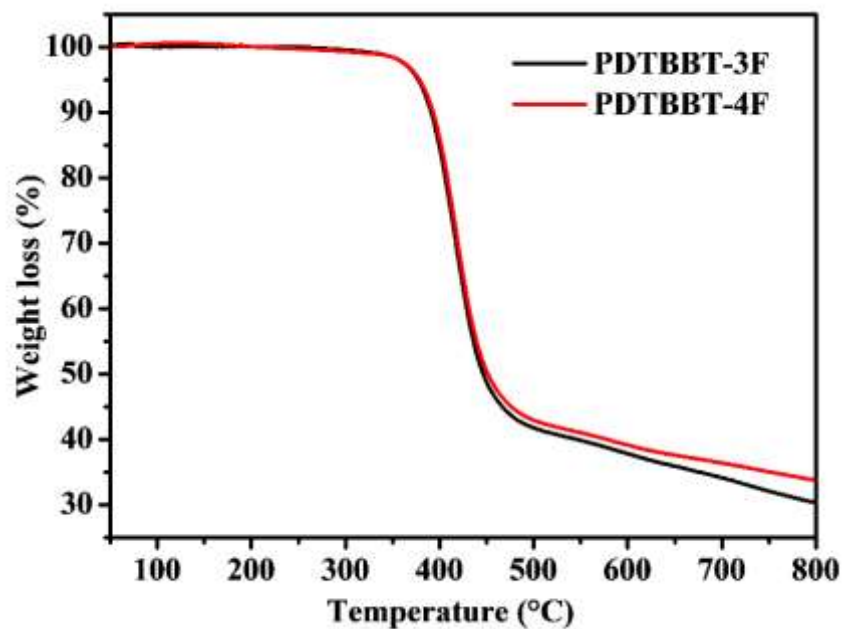

**Fig. S18.** TGA curves of **PDTBBT-3F** and **PDTBBT-4F** at heating rate of  $10\text{ }^{\circ}\text{C min}^{-1}$  under  $N_2$ .

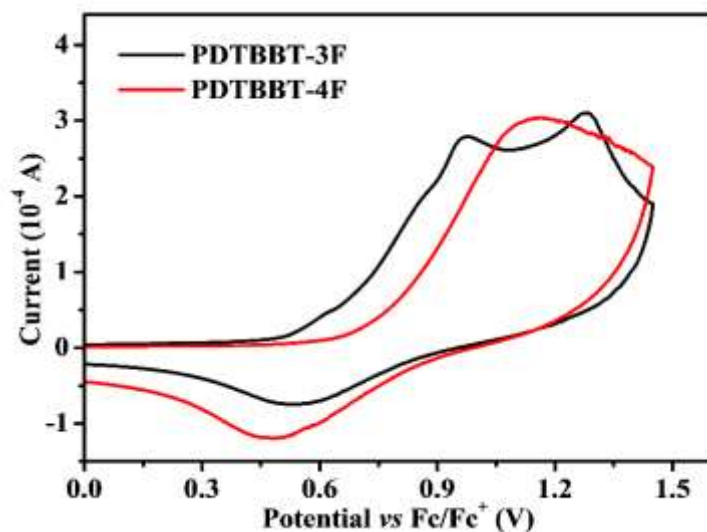

**Fig. 19** Cyclic voltammograms of the polymers in thin film (drop cast from 3 mg mL<sup>-1</sup> chloroform solution) measured in acetonitrile (0.1 M Bu<sub>4</sub>NPF<sub>6</sub>) at a scan rate of 80 mV s<sup>-1</sup>.

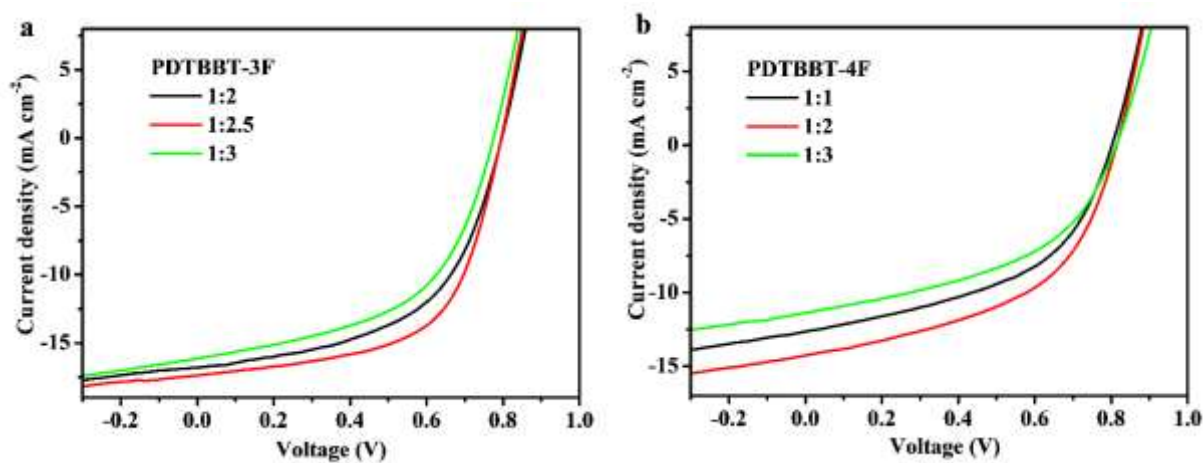

**Fig. S20** *J-V* characteristics of a) **PDTBBT-3F** and b) **PDTBBT-4F** based PSCs with different polymers:PC<sub>71</sub>BM blend ratios (solvent: *o*-DCB).

**Table S1.** Photovoltaic properties of Polymers:PC<sub>71</sub>BM PSCs in conventional architecture at different D/A weight ratios ((parenthesized with the average values and standard deviations over 15 devices))

| Polymer   | D:A ratio<br>(w/w) | Thickness<br>(nm) | $V_{oc}$<br>(V)          | $J_{sc}$<br>(mA cm <sup>-2</sup> ) | FF<br>(%)            | PCE<br>(%)            |
|-----------|--------------------|-------------------|--------------------------|------------------------------------|----------------------|-----------------------|
| PDTBBT-3F | 1:2                | 201 ± 2           | 0.801<br>(0.796 ± 0.008) | 16.80<br>(16.52 ± 0.32)            | 55.3<br>(54.8 ± 1.0) | 7.39<br>(7.16 ± 0.25) |
|           | 1:2.5              | 205 ± 3           | 0.804<br>(0.798 ± 0.009) | 17.35<br>(17.12 ± 0.30)            | 59.8<br>(59.4 ± 0.9) | 8.33<br>(8.15 ± 0.21) |
|           | 1:3                | 203 ± 3           | 0.768<br>(0.763 ± 0.007) | 16.12<br>(15.89 ± 0.26)            | 52.8<br>(52.4 ± 0.8) | 6.58<br>(6.41 ± 0.19) |
| PDTBBT-4F | 1:1                | 178 ± 2           | 0.803<br>(0.798 ± 0.008) | 12.64<br>(12.42 ± 0.28)            | 48.6<br>(48.1 ± 0.8) | 4.95<br>(4.79 ± 0.23) |
|           | 1:2                | 185 ± 2           | 0.817<br>(0.812 ± 0.007) | 14.25<br>(14.03 ± 0.24)            | 50.7<br>(50.3 ± 1.0) | 5.92<br>(5.79 ± 0.16) |
|           | 1:3                | 190 ± 3           | 0.812<br>(0.806 ± 0.01)  | 11.36<br>(11.12 ± 0.30)            | 47.3<br>(46.8 ± 0.9) | 4.33<br>(4.18 ± 0.20) |

**Table S2** The optimized photovoltaic properties of PDTBBT-3F:PC<sub>71</sub>BM = 1:2.5 and PDTBBT-4F:PC<sub>71</sub>BM = 1:2 PSCs in conventional architecture with processing additives of DIO and DPE (v/v, *o*-DCB).

| BHJ                                      | Additive | $V_{oc}$<br>(V)          | $J_{sc}$<br>(mA cm <sup>-2</sup> ) | FF<br>(%)            | PCE <sup>a</sup><br>(%) |
|------------------------------------------|----------|--------------------------|------------------------------------|----------------------|-------------------------|
| PDTBBT-3F:PC <sub>71</sub> BM<br>= 1:2.5 | W/O      | 0.804<br>(0.798 ± 0.009) | 17.35<br>(17.12 ± 0.30)            | 59.8<br>(59.4 ± 0.9) | 8.33<br>(8.15 ± 0.21)   |
|                                          | 1% DIO   | 0.785<br>(0.779 ± 0.008) | 15.02<br>(14.81 ± 0.25)            | 49.8<br>(49.3 ± 0.9) | 5.87<br>(5.73 ± 0.19)   |
|                                          | 2% DIO   | 0.793<br>(0.786 ± 0.008) | 15.98<br>(15.76 ± 0.27)            | 52.6<br>(52.1 ± 0.7) | 6.64<br>(6.47 ± 0.17)   |
|                                          | 3% DIO   | 0.764<br>(0.758 ± 0.007) | 14.56<br>(14.34 ± 0.26)            | 46.4<br>(45.8 ± 0.8) | 5.13<br>(4.95 ± 0.23)   |
|                                          | 1% DPE   | 0.814<br>(0.808 ± 0.008) | 16.33<br>(16.07 ± 0.30)            | 51.2<br>(52.4 ± 1.0) | 6.81<br>(6.59 ± 0.25)   |
|                                          | 2% DPE   | 0.822<br>(0.815 ± 0.01)  | 16.65<br>(16.39 ± 0.33)            | 53.5<br>(53.0 ± 0.9) | 7.26<br>(7.03 ± 0.27)   |
|                                          | 3% DPE   | 0.809<br>(0.803 ± 0.009) | 15.79<br>(15.56 ± 0.28)            | 48.9<br>(48.3 ± 0.8) | 6.25<br>(6.08 ± 0.20)   |
| PDTBBT-4F:PC <sub>71</sub> BM<br>= 1:2   | W/O      | 0.817<br>(0.812 ± 0.007) | 14.25<br>(14.03 ± 0.24)            | 50.7<br>(50.3 ± 1.0) | 5.92<br>(5.79 ± 0.16)   |
|                                          | 1% DIO   | 0.779<br>(0.772 ± 0.008) | 11.93<br>(11.70 ± 0.27)            | 43.8<br>(43.3 ± 0.9) | 4.07<br>(3.92 ± 0.18)   |
|                                          | 2% DIO   | 0.782<br>(0.777 ± 0.009) | 12.78<br>(12.53 ± 0.29)            | 46.2<br>(45.7 ± 0.8) | 4.61<br>(4.48 ± 0.19)   |
|                                          | 3% DIO   | 0.743<br>(0.738 ± 0.007) | 9.87<br>(9.69 ± 0.23)              | 42.8<br>(42.2 ± 0.9) | 3.13<br>(2.98 ± 0.17)   |
|                                          | 1% DPE   | 0.760<br>(0.752 ± 0.01)  | 13.02<br>(12.75 ± 0.32)            | 43.6<br>(43.0 ± 0.9) | 4.31<br>(4.14 ± 0.23)   |
|                                          | 2% DPE   | 0.778<br>(0.772 ± 0.01)  | 13.62<br>(13.38 ± 0.30)            | 45.6<br>(45.1 ± 0.9) | 4.83<br>(4.62 ± 0.25)   |
|                                          | 3% DPE   | 0.702<br>(0.695 ± 0.009) | 10.87<br>(10.66 ± 0.28)            | 39.7<br>(39.2 ± 0.8) | 3.02<br>(2.89 ± 0.20)   |

<sup>a</sup> The average values and standard deviations of 8 devices are shown in parentheses.

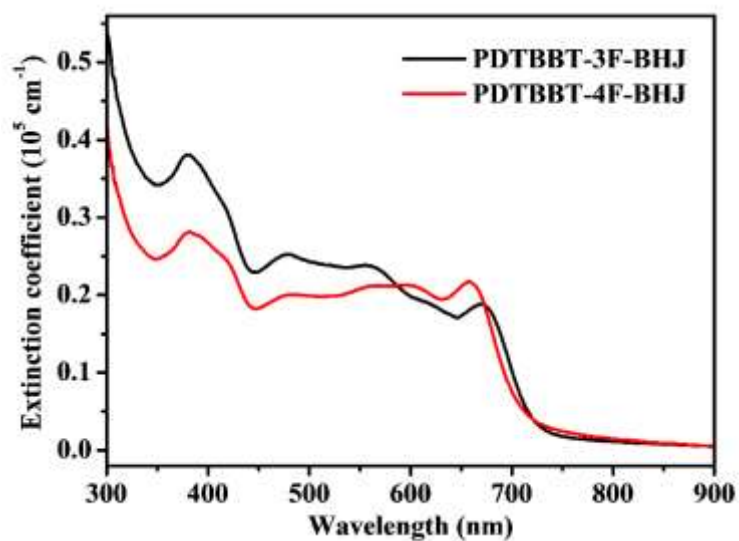

**Figure S21.** Extinction coefficient spectra of BJJ blend films for optimum device based on the Polymers: PC<sub>71</sub>BM prepared from *o*-DCB.

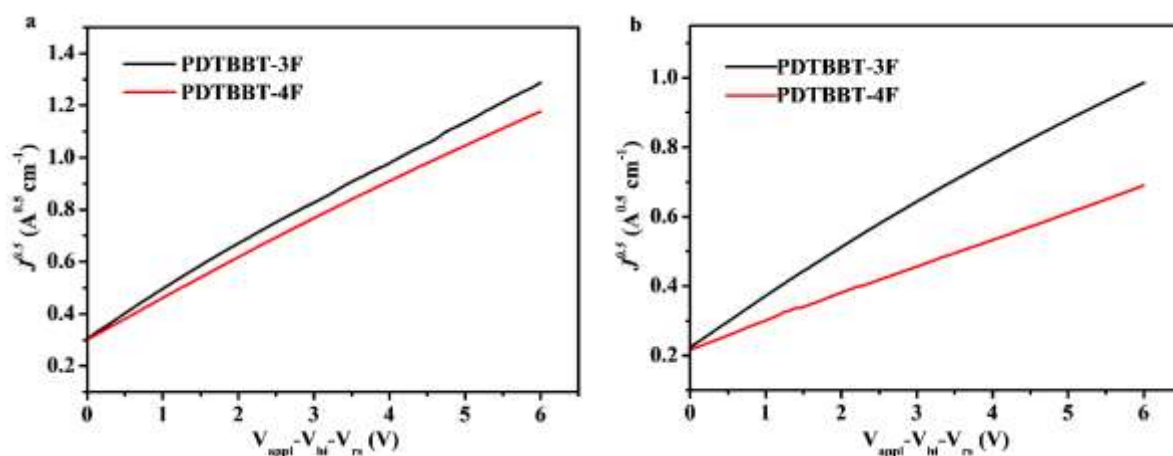

**Fig. S22**  $J^{0.5}$  vs  $V_{\text{appl}} - V_{\text{bi}} - V_{\text{rs}}$  plots for a) hole-only and b) electron-only devices of **PDTBBT-3F** and **PDTBBT-4F** blend films.

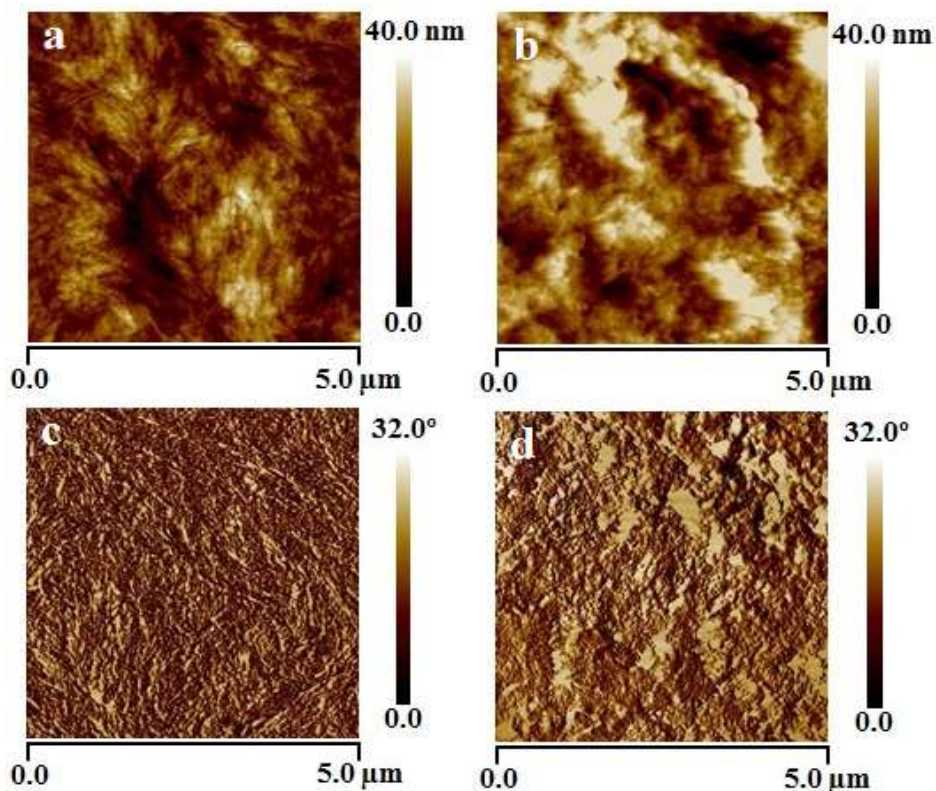

**Fig. S23** Tapping-mode AFM height (a and b) and phase (c and d) images of PDTBBT-3F:PC<sub>71</sub>BM (a and c) and PDTBBT-4F:PC<sub>71</sub>BM (b and d) blends, respectively.

**Table S3.** Physical parameters of PDTBBT-3F:PC<sub>71</sub>BM and PDTBBT-4F:PC<sub>71</sub>BM devices.

| Polymer       | Leakage current<br>at -3V (mA cm <sup>-2</sup> ) | Rectification<br>factor (-3V, 3V) | $\mu_h^a$<br>(10 <sup>-4</sup> cm <sup>2</sup> V <sup>-1</sup> s <sup>-1</sup> ) | $\mu_e^a$<br>(10 <sup>-4</sup> cm <sup>2</sup> V <sup>-1</sup> s <sup>-1</sup> ) | $\mu_h/\mu_e$ |
|---------------|--------------------------------------------------|-----------------------------------|----------------------------------------------------------------------------------|----------------------------------------------------------------------------------|---------------|
| PDTBBT-3F-BHJ | 0.31                                             | 680                               | 5.65 ± 0.17                                                                      | 4.18 ± 0.20                                                                      | 1.37          |
| PDTBBT-4F-BHJ | 0.74                                             | 112                               | 4.12 ± 0.15                                                                      | 0.87 ± 0.23                                                                      | 4.80          |

<sup>a</sup>Average values and standard deviations from 6 devices.

**Table S4.** The coherence length ( $L_C$ ) and full width at half-maximum (FWHM) along both OOP and IP direction of the neat PDTBBT-3F and PDTBBT-4F, and the corresponding polymers:PC<sub>71</sub>BM blend films devices (According to the Scherrer's equation,  $L_C = 2\pi/\text{fwhm}$ )

| Polymer       | OOP                        |                        |                            |                        | IP                         |                        |
|---------------|----------------------------|------------------------|----------------------------|------------------------|----------------------------|------------------------|
|               | 100                        |                        | 010                        |                        | 100                        |                        |
|               | FWHM ( $\text{\AA}^{-1}$ ) | $L_C$ ( $\text{\AA}$ ) | FWHM ( $\text{\AA}^{-1}$ ) | $L_C$ ( $\text{\AA}$ ) | FWHM ( $\text{\AA}^{-1}$ ) | $L_C$ ( $\text{\AA}$ ) |
| PDTBBT-3F     | 0.0424                     | 148.1                  | 0.296                      | 21.2                   | 0.0521                     | 120.5                  |
| PDTBBT-4F     | 0.0580                     | 108.3                  | 0.171                      | 36.8                   | 0.0382                     | 164.4                  |
| PDTBBT-3F-BHJ | 0.0325                     | 193.5                  | 0.206                      | 30.4                   | 0.0344                     | 182.6                  |
| PDTBBT-4F-BHJ | 0.0464                     | 135.2                  | 0.278                      | 22.6                   | 0.0512                     | 122.6                  |
